# Supplementary material
Source: PubMed Central journal article supplement (PMC5423213)

**A**

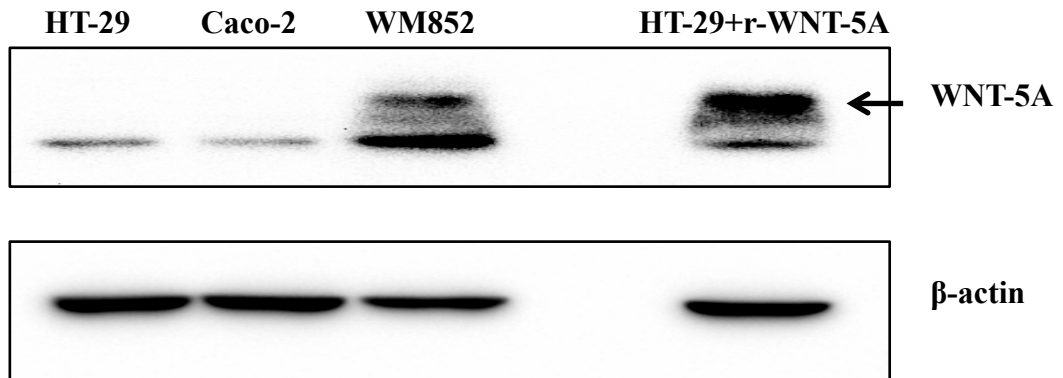

**B**

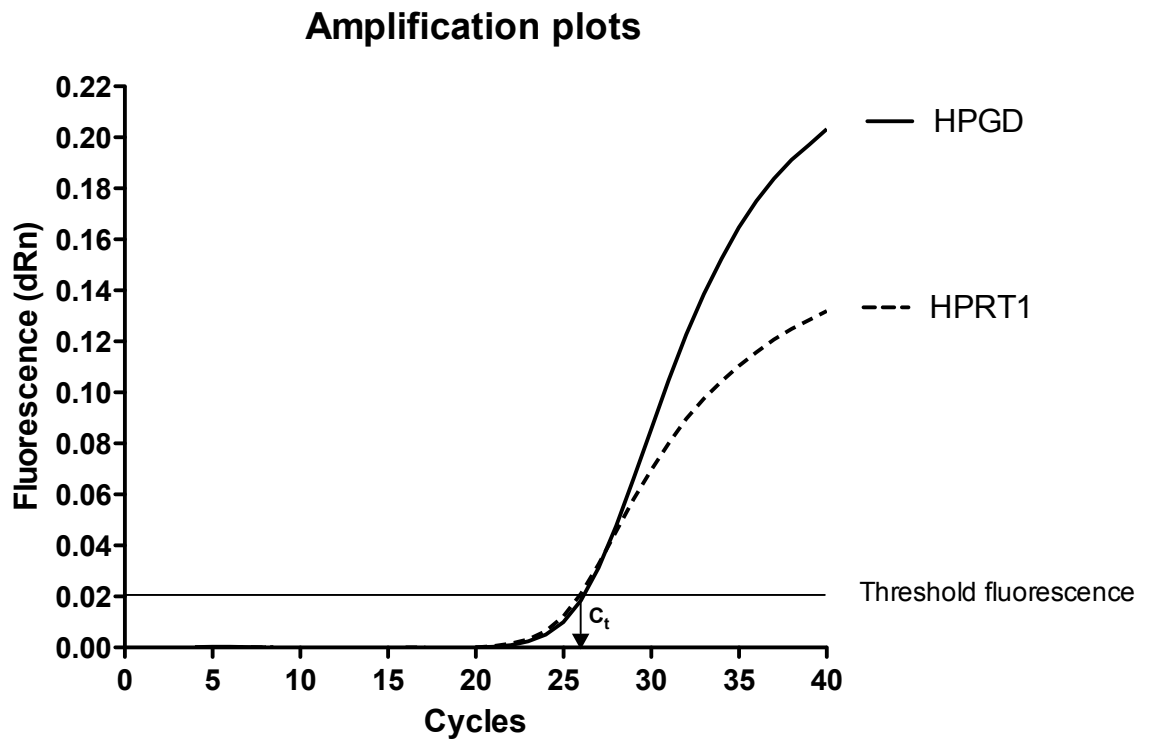

**Supplementary Figure 1**

Supplement: MOL2-10-1415-s002.pdf [file MOL2-10-1415-s002.pdf]

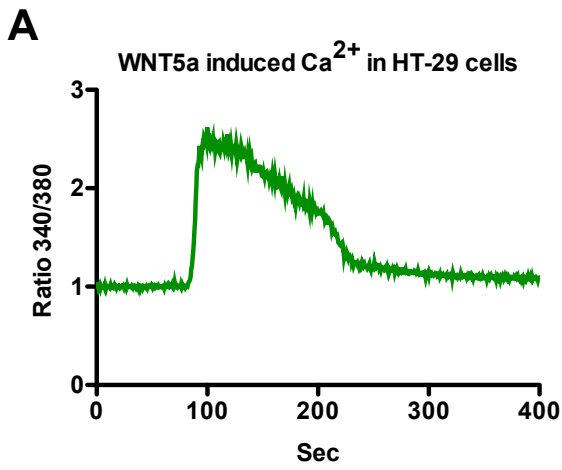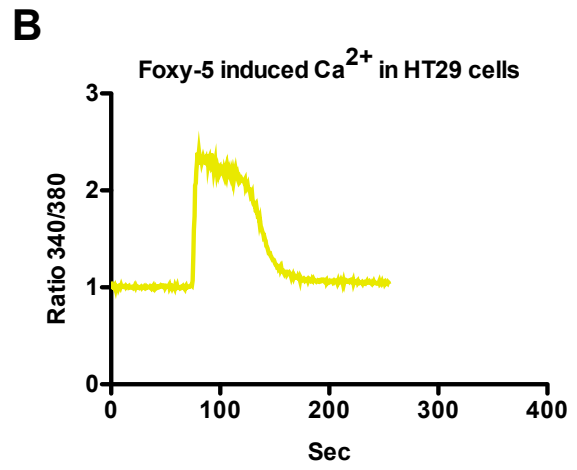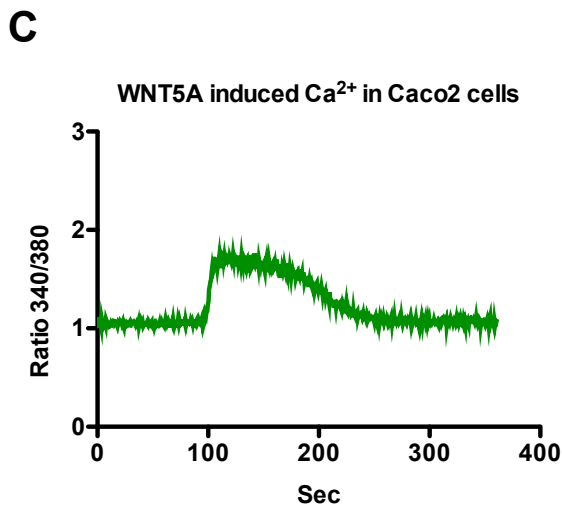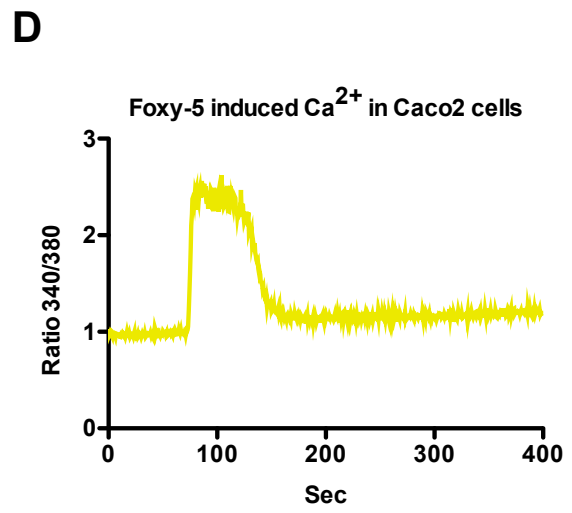

Supplementary Figure 2

Supplement: MOL2-10-1415-s003.pdf [file MOL2-10-1415-s003.pdf]

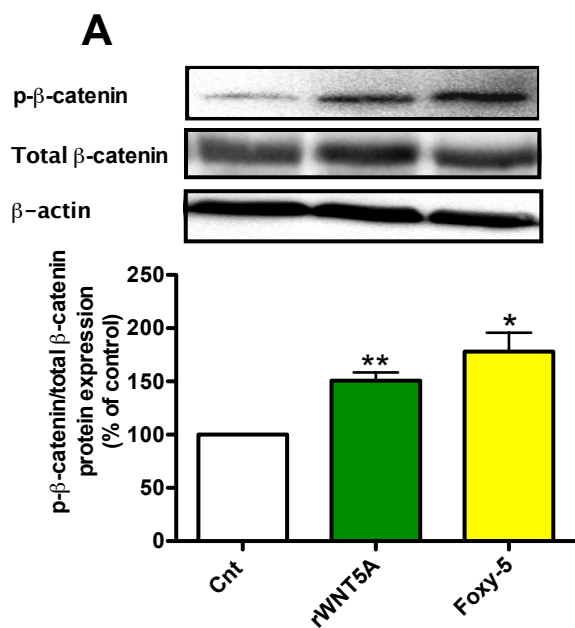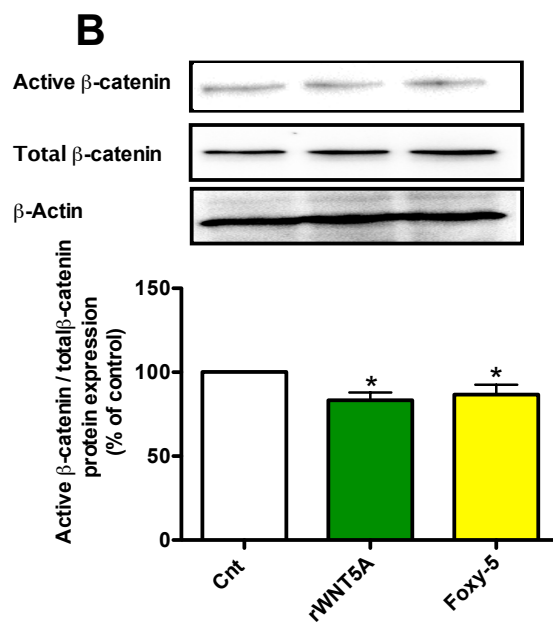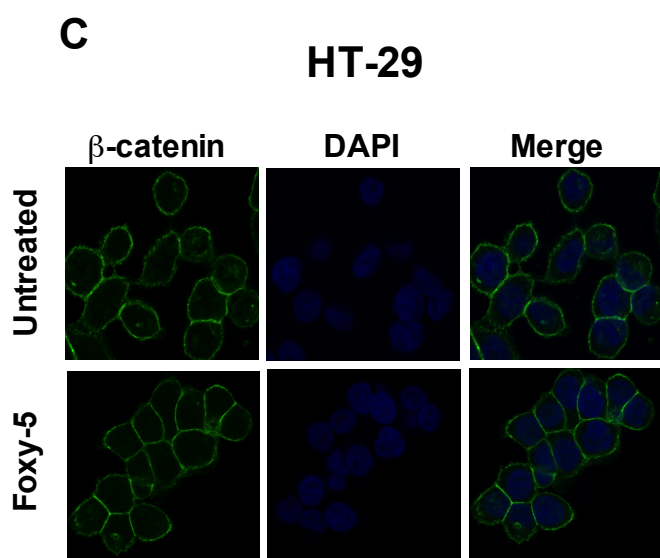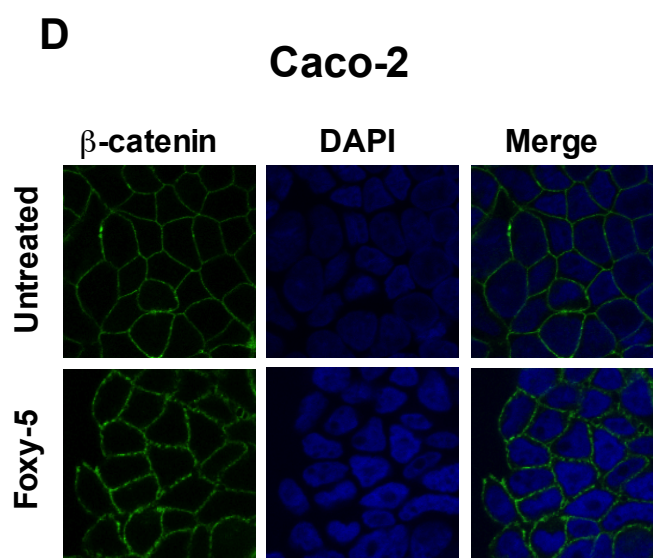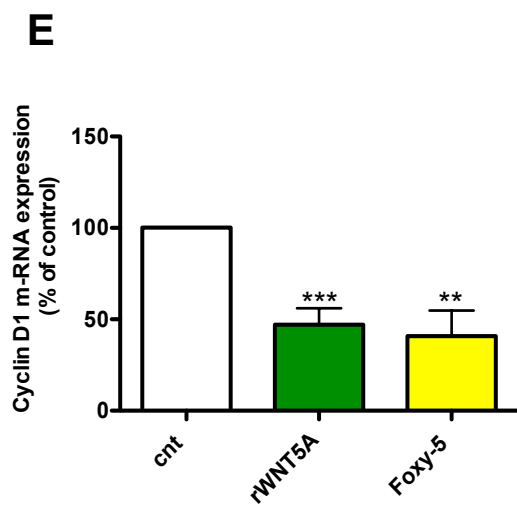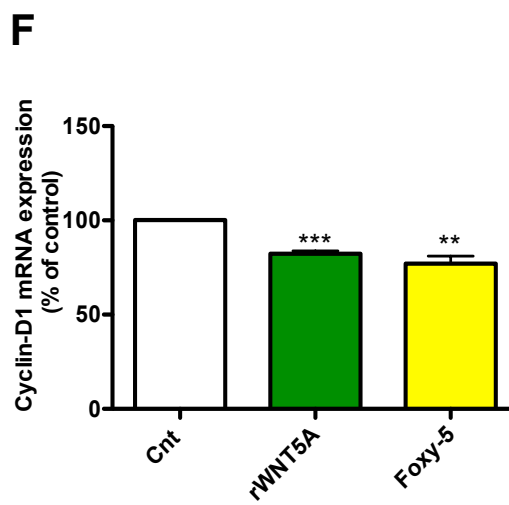

Supplementary Figure 3

Supplement: MOL2-10-1415-s004.pdf [file MOL2-10-1415-s004.pdf]

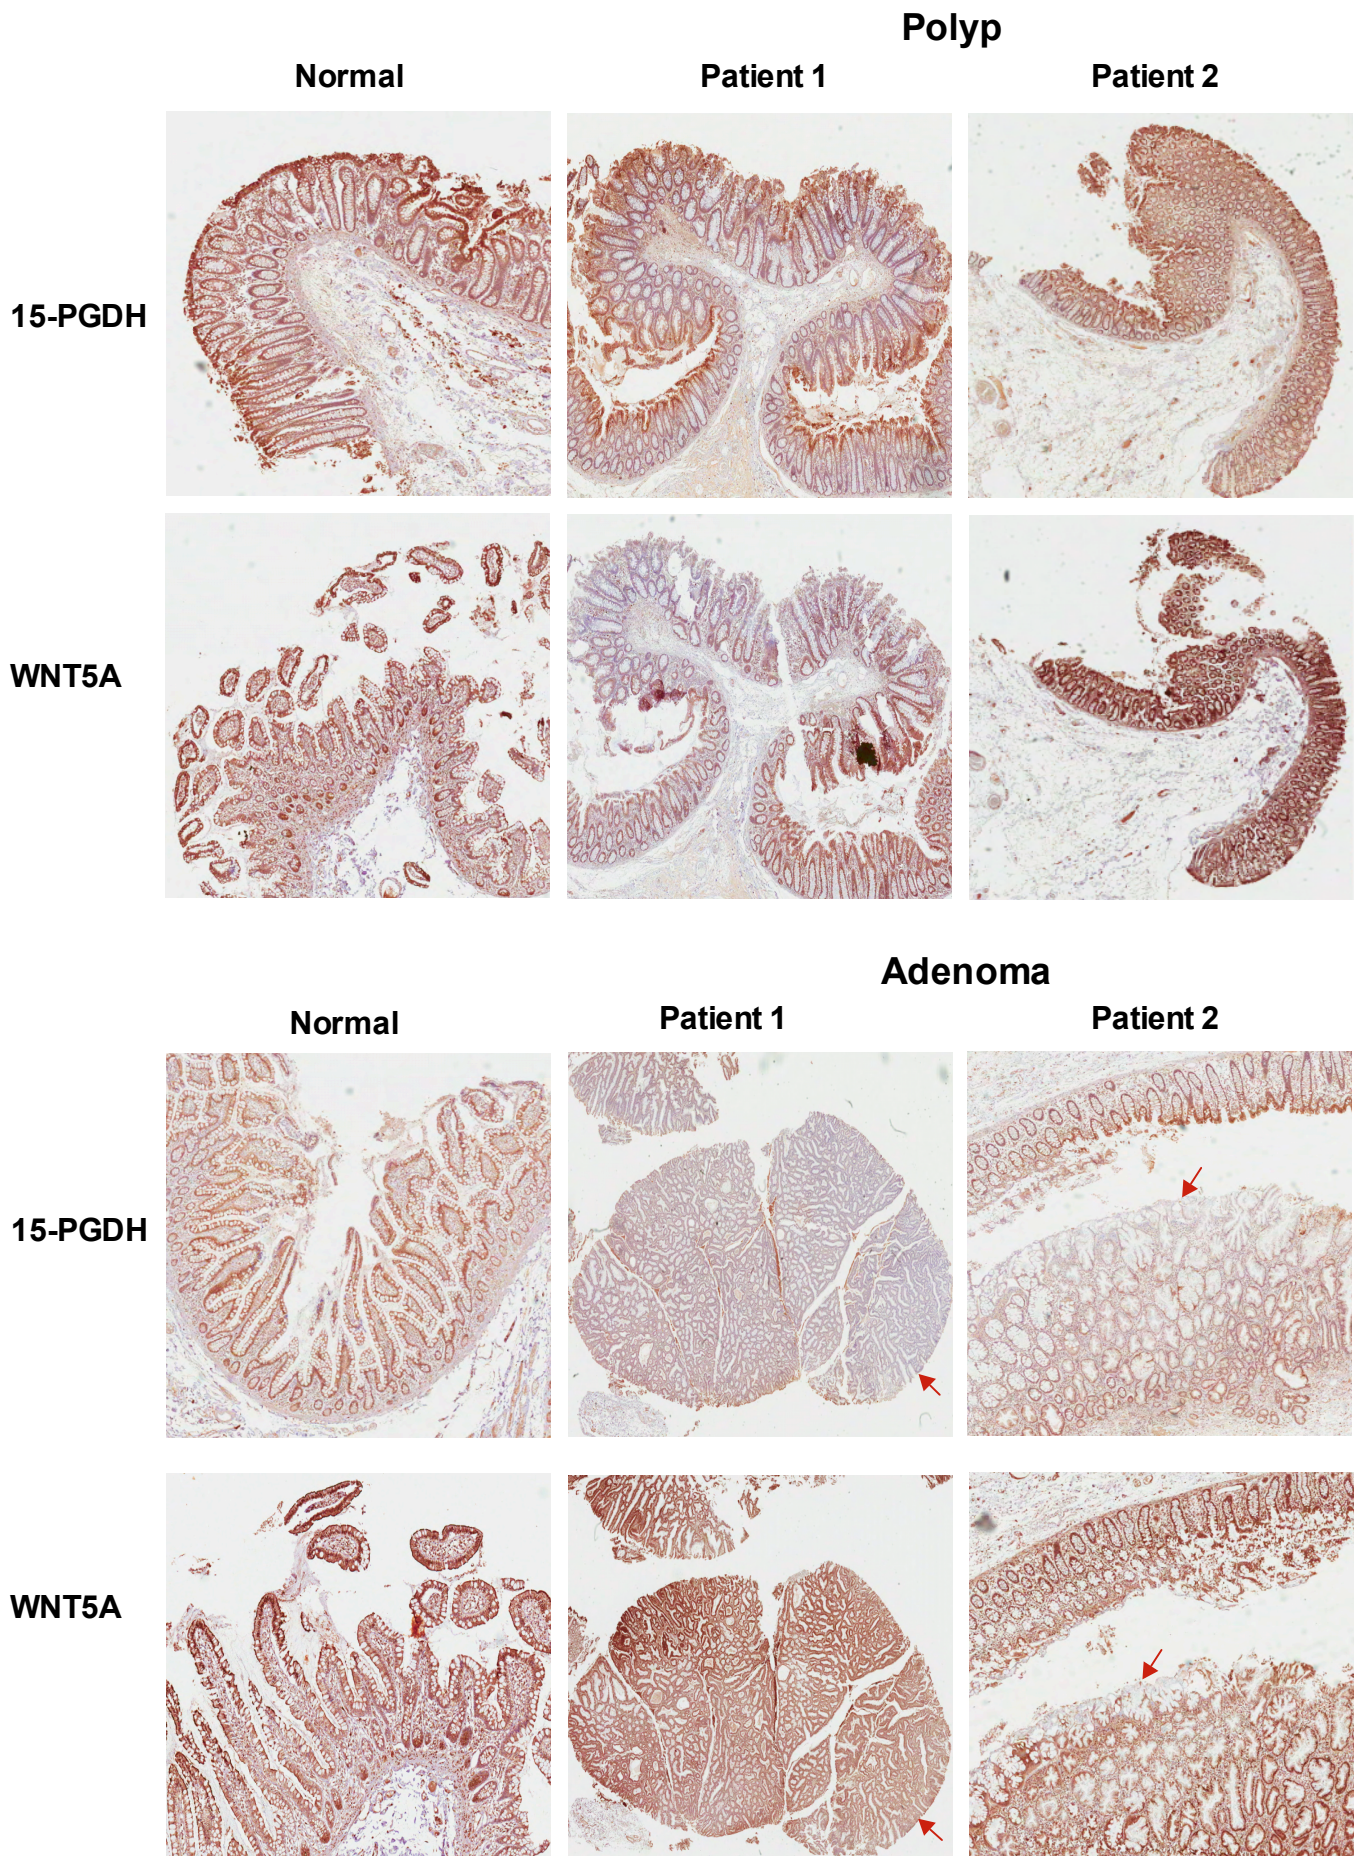

**Supplementary Figure 4**

Supplement: MOL2-10-1415-s005.pdf [file MOL2-10-1415-s005.pdf]
